## Erratum to: Implementing bound constraints and total-variation regularization in extended full-waveform inversion with the alternating direction method of multiplier: application to large contrast media

by H.S. Aghamiry,<sup>1,2</sup> A. Gholami<sup>1</sup> and S. Operto<sup>2</sup>

<sup>1</sup>*Institute of Geophysics, University of Tehran, Tehran, Iran. E-mail: agholami@ut.ac.ir*

<sup>2</sup>*Université Côte d'Azur, CNRS, Observatoire de la Côte d'Azur, IRD, Géoazur, F-06560, Valbonne, France*

In the original version of this paper, Algorithm 1 (BTV regularized IR-WRI algorithm based on the PRS algorithm) was omitted. This has now been corrected.
